# Supplementary material
Source: MDPI journal article supplement (https://www.mdpi.com/1424-8247/13/12/443)

Supplementary figure (3S)

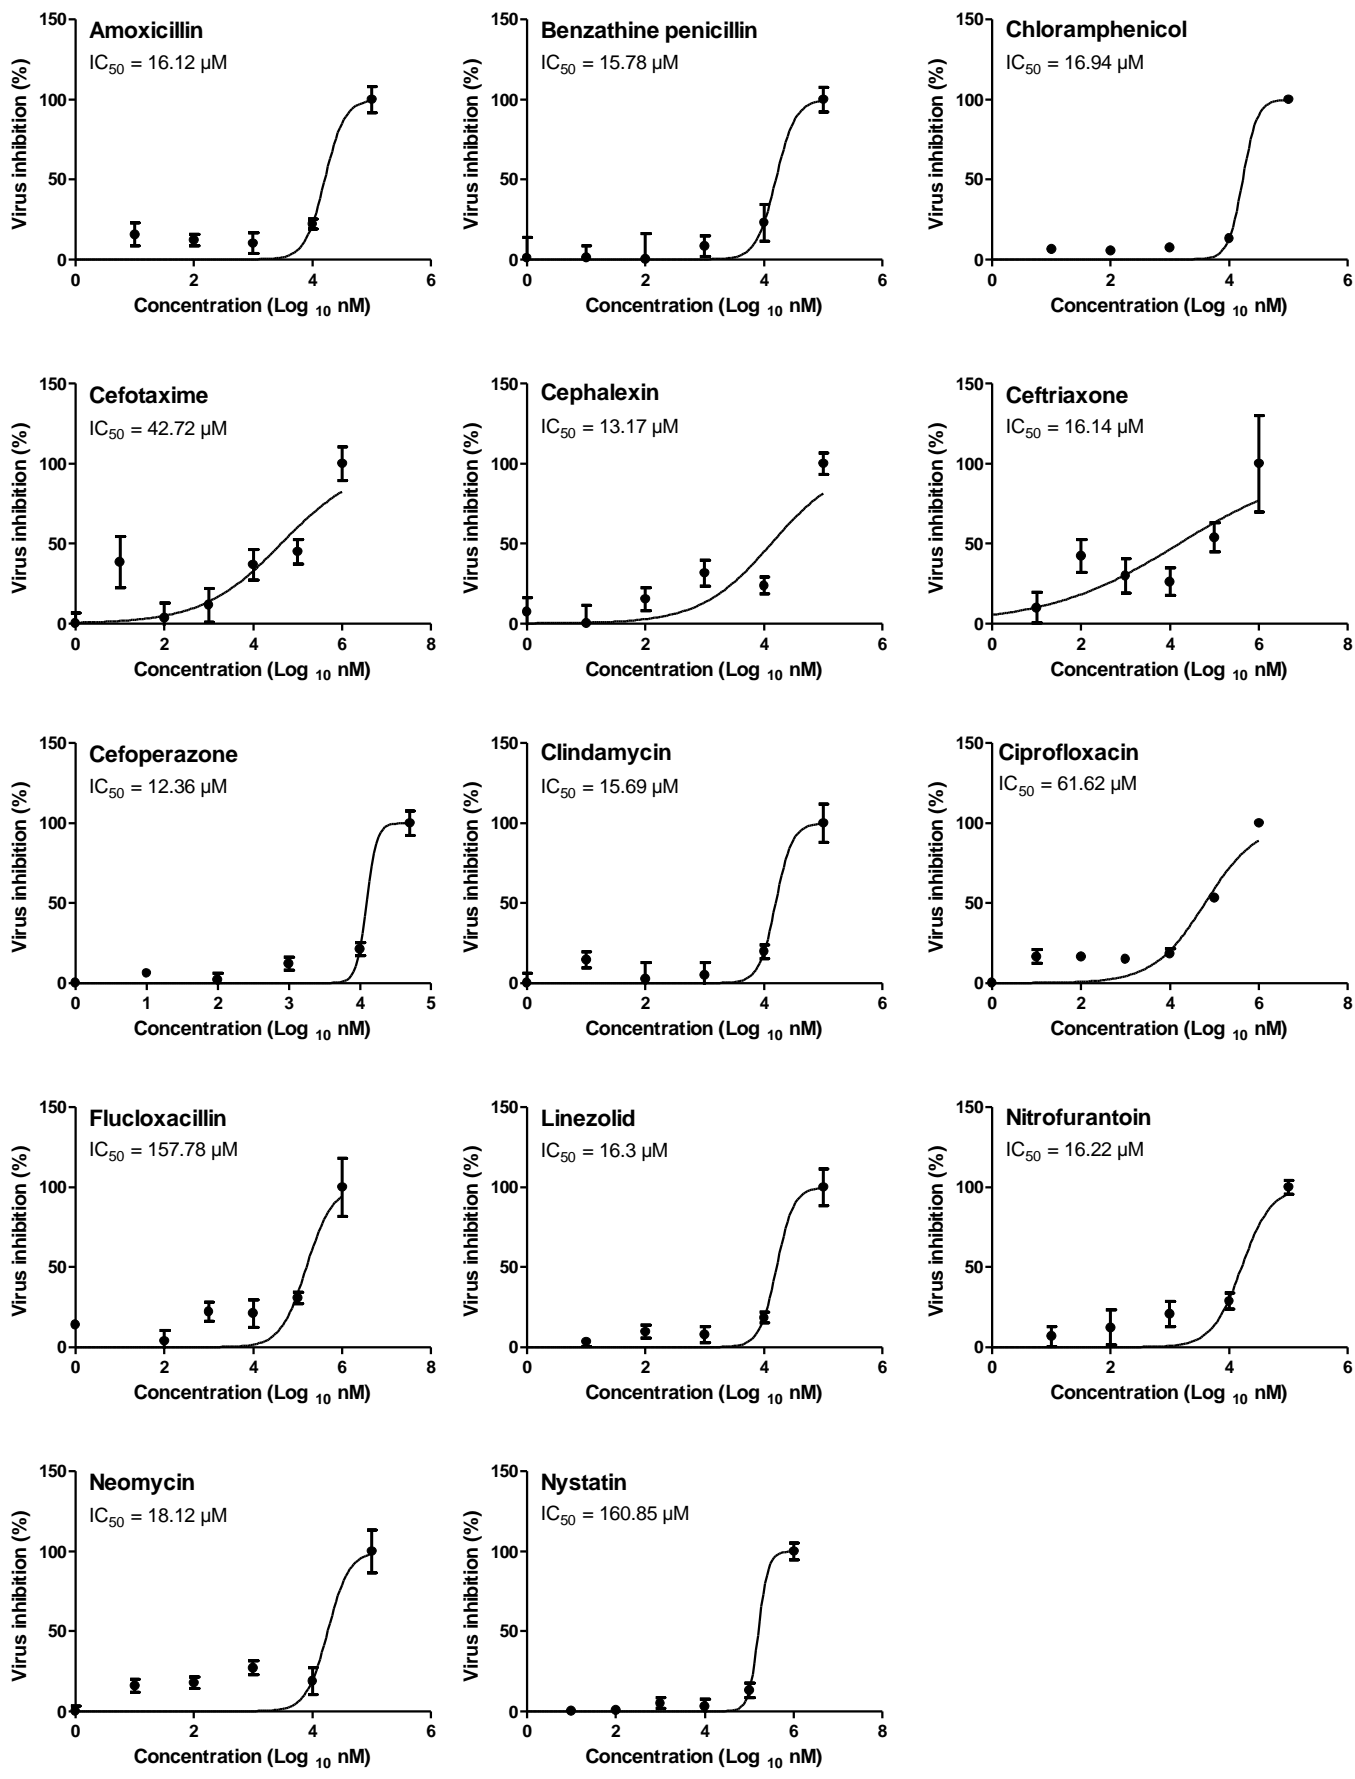

Supplement: s1 [file s1]

Supplementary Figure (1S)

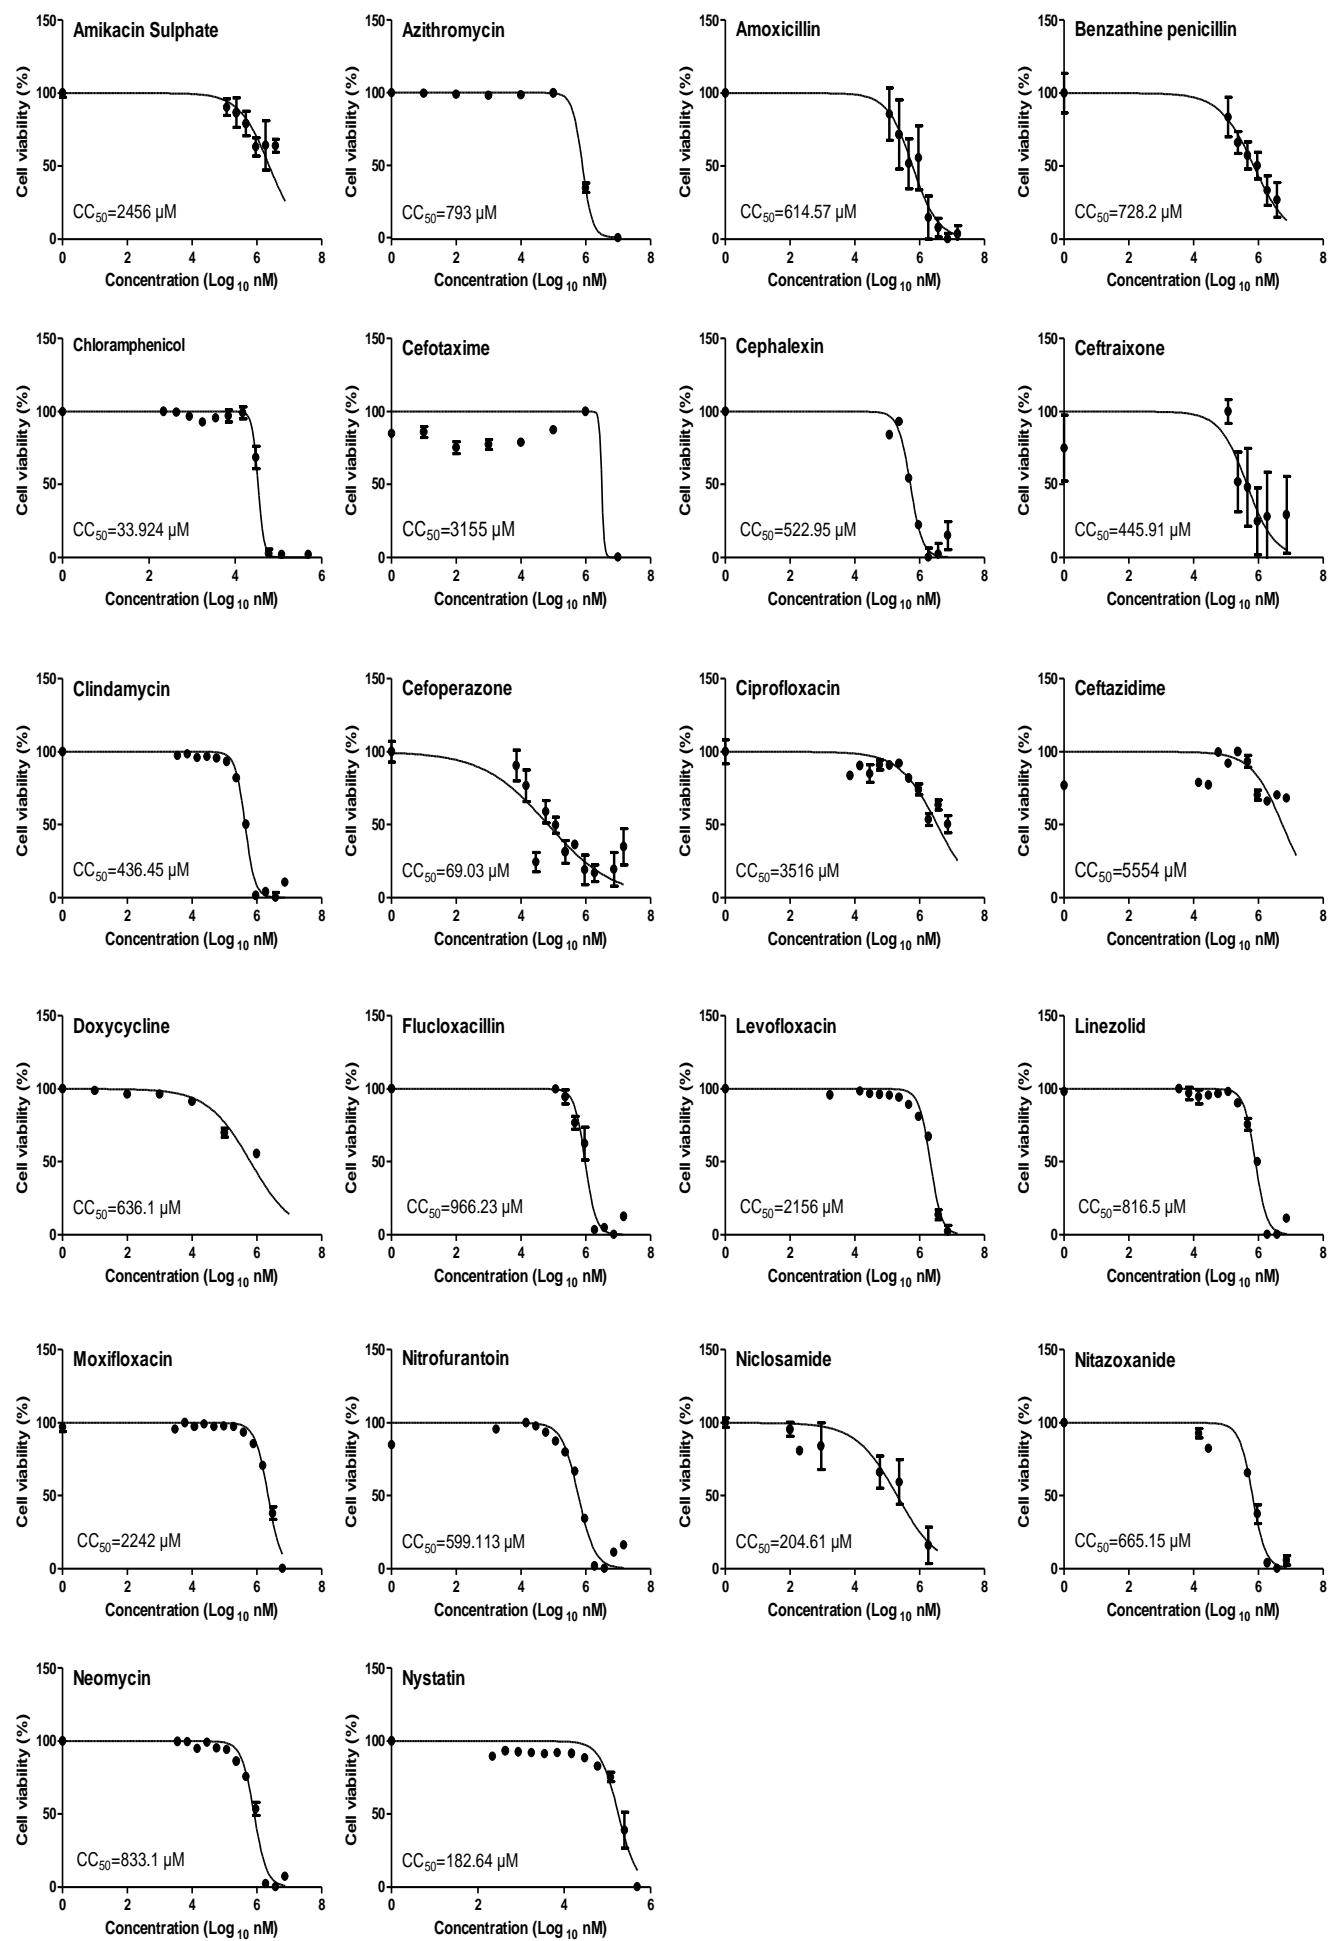

Supplement: s1 [file s1]

Supplementary figure (2S)

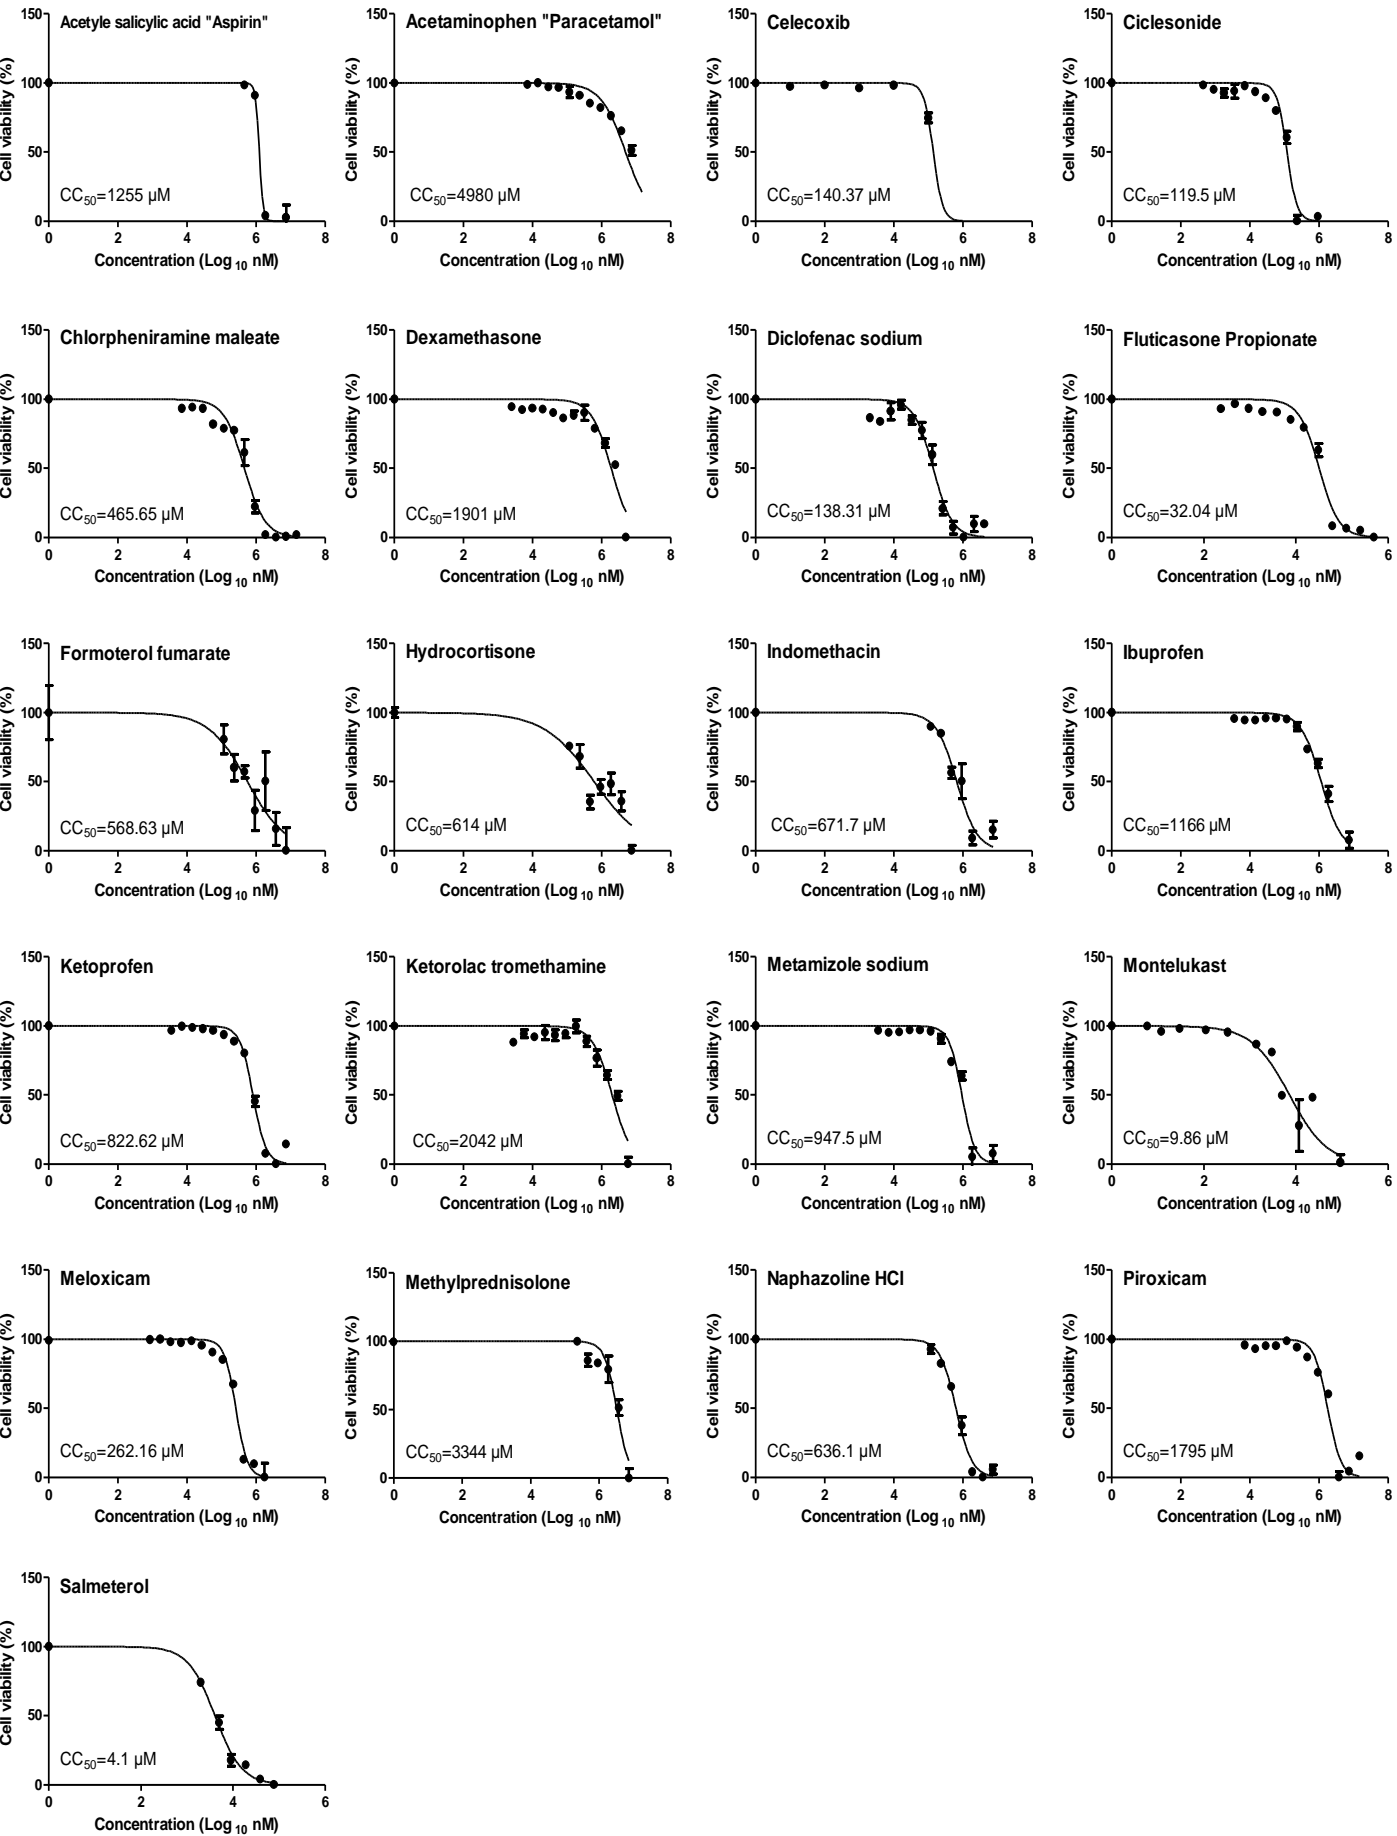

Supplement: s1 [file s1]

Supplementary figure (4S)

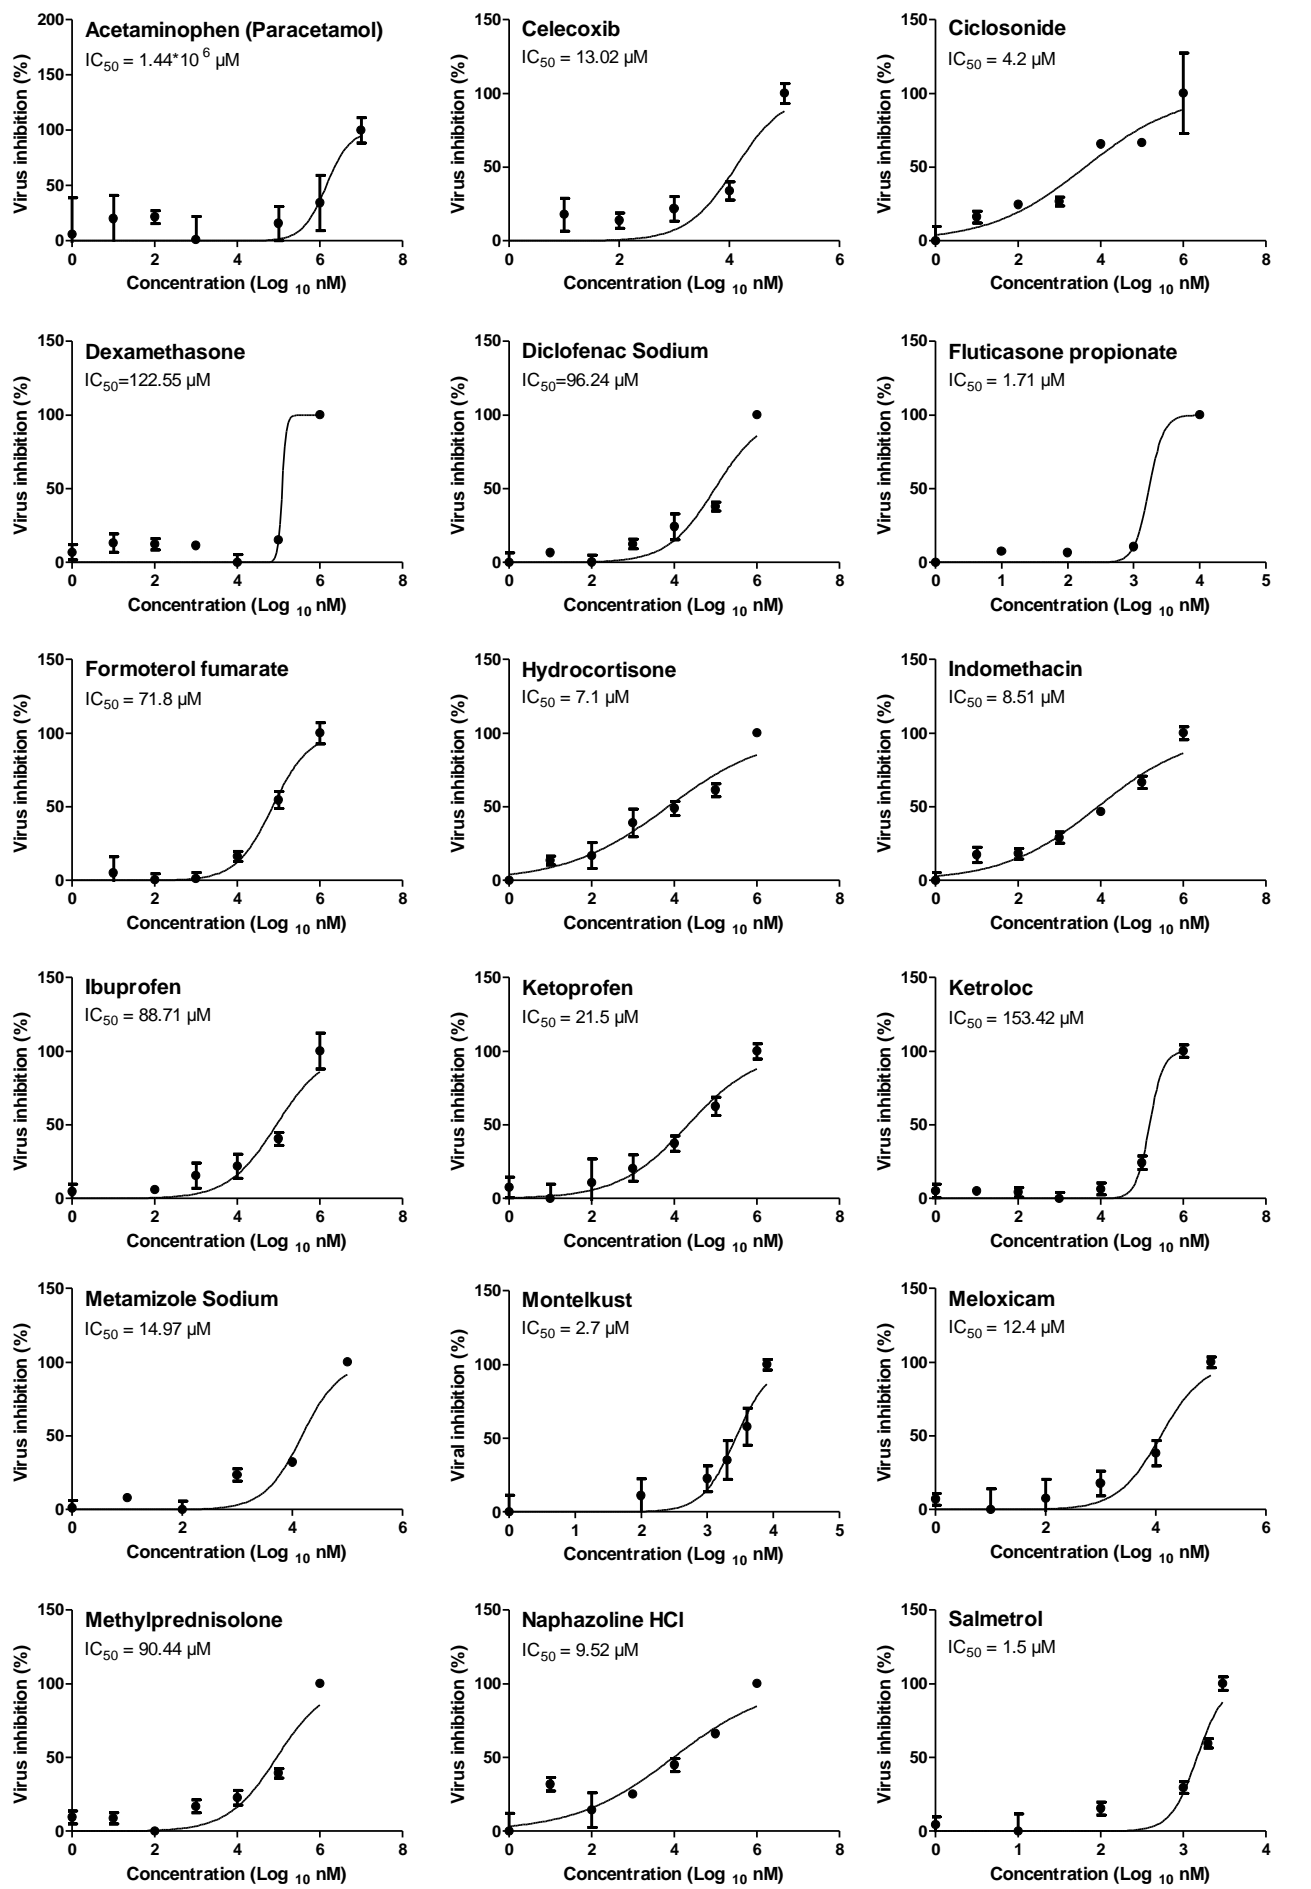

Supplement: s1 [file s1]
